# Supplementary material
Source: PubMed Central journal article supplement (PMC8427485)
Supplement: jamapsychiatry-e212488-s001.pdf [file jamapsychiatry-e212488-s001.pdf]

1 Online 1-Day Cognitive Behavioral Therapy-Based Workshops for Postpartum Depression: A  
2 Randomized Controlled Trial

3 *\*Authors' Note: The study submitted to the Hamilton Integrated Research Ethics Board below*  
4 *contains a second objective relating to health economic analyses. These are not included in the*  
5 *present manuscript as they will be described in a separate report.*

6 **COVID-19 and Postpartum Depression:** The COVID-19 pandemic has further exposed the  
7 vulnerabilities in social and economic systems that lead to inequalities for mothers with mental health  
8 problems and their children, worsening unintended systematic biases that exist within the healthcare  
9 system. These women may be among the most affected by the pandemic, experiencing substantial  
10 worry, isolation, loneliness, lack of control, and insomnia, all of which have increased PPD rates. They  
11 also have more responsibilities than ever before, providing care to their infants, toddlers, and older  
12 children, while managing their households and supporting their partners. They are also profoundly  
13 worried about job losses, reduced income, and food insecurity, all of which have disrupted family  
14 routines, increased partner conflict, and rates of intimate partner violence.

15 Postpartum depression (PPD) typically affects up to 1 in 5 women,<sup>1-3</sup> increasing the risk of later  
16 depressive episodes,<sup>2</sup> parenting problems,<sup>3</sup> poor mother-infant attachment,<sup>4</sup> and emotional, behavioural,  
17 and school problems in offspring.<sup>7,8</sup> A single case of PPD has been estimated to cost as much as  
18 \$150,000 over the lifespan,<sup>5</sup> or \$57 billion for each annual cohort of Canadian births. Even under ideal  
19 conditions, the healthcare system is poorly equipped to provide care for problems requiring urgent  
20 psychotherapy like PPD (e.g., just 1 in 10 women with PPD receive evidence-based care).<sup>17</sup> Barriers to  
21 care include women's preference for psychotherapy over medication, a lack of time, and a reluctance to  
22 travel to regular appointments.<sup>6,7</sup> The healthcare system is now even less able to help these women as  
23 public health units that previously supported the mental health of mothers have shifted their priorities  
24 to direct COVID response. Moreover, social distancing recommendations aimed at reducing COVID-  
25 19 risk have inadvertently increased psychological distress and decreased access to resources that  
26 protect against PPD including social and practical support from family, friends, and professionals. The  
27 need for safe and accessible PPD treatment is further highlighted by the uptake of recent  
28 recommendations (written by the NPI) on managing PPD during COVID-19 which have been read  
29 40,000 times since their posting.<sup>8</sup>

30 Only interventions that are considered safe and that can be rapidly upscaled can have an impact on PPD  
31 at the population level during COVID-19.<sup>9</sup> Ideal large-scale interventions for PPD during COVID-19  
32 are not only safe (i.e., delivered online), but are brief, utilize the treatments most preferred by women  
33 (i.e., non-pharmacological), easily accessible (i.e., self-referred), provide skills that can be used over  
34 the long-term, and delivered in large groups to increase social support. At present time, no  
35 interventions exist that meet all of these criteria.

36 **The Potential of Online 1-Day CBT-Based Workshops:** The delivery of psychotherapy in large  
37 groups (up to 30 participants) is a relatively new phenomenon,<sup>9</sup> but may be capable of treating PPD on  
38 the scale required to address its prevalence during COVID-19. CBT-based psychoeducational  
39 workshops have been used in the UK to reduce stress and treat generalized anxiety disorder,<sup>9,10</sup> with  
40 gains retained up to 2 years after treatment.<sup>11</sup> Brown and colleagues delivered 1-Day CBT-Based  
41 Workshops to an older general population sample of adults with depression in the UK and found them  
42 to be effective (with larger effects for women).<sup>12</sup> Given the unique features of PPD (more comorbid  
43 anxiety, social isolation self-deprecatory cognitions,) and the unique impact COVID-19 has on  
44 mothers, face-to-face workshops should be adapted for women with PPD, delivered online, and tested.

46 **Primary Research Question:** Can Online 1-Day CBT-Based Workshops for PPD added to care as  
47 usual during the COVID-19 pandemic improve PPD more than usual care alone?

48 **Secondary:** Are the workshops cost-effective?

49 **Tertiary:** Can these workshops reduce the impact of the common comorbidities and complications of  
50 PPD (anxiety, support, mother-infant attachment, temperament)?

51 **Hypotheses:** Online 1-Day CBT-Based Workshops will be an effective (and cost-effective) way to  
52 rapidly improve PPD and its comorbidities during COVID-19 and beyond.

53 **The Urgent Need for a Trial:** Practice guidelines for PPD suggest that structured  
54 psychotherapies(e.g., CBT) are cost-effective,<sup>13,14</sup> though these studies generally involve small groups  
55 (<10) and consist of 12-15 sessions.<sup>15,16</sup> Antidepressants are effective but women are reluctant to use  
56 them,<sup>17</sup> and nutritional<sup>18</sup> and exercise<sup>18</sup> interventions have small effect sizes and often require clinician  
57 support.

58 Group psychotherapy is preferred by many women for the support, symptom normalization, and  
59 opportunity to learn via modeling it provides.<sup>19</sup> It reduces the profound social isolation and loneliness  
60 women are experiencing, increases connectedness, empowers women to give and receive care, and  
61 grows the support networks these mothers need during COVID-19.<sup>20</sup> However, most women cannot  
62 attend 12-15 weekly sessions, and so a shift toward interventions that safely reach large numbers of  
63 sufferers with maximum efficiency is needed.

64 In order to determine if any very brief psychotherapeutic interventions for PPD currently exist, a  
65 systematic search of Medline, Embase, CINAHL, PsycINFO and Web of Science was conducted on  
66 June 29, 2020. It identified 1256 potentially relevant articles, but no trials or observational studies. No  
67 existing trials were present in clinical trials databases.

68 **Existing RCT and Feasibility Data:** We previously conducted an RCT of three sets of *face-to-face* 1-  
69 Day CBT-Based Workshops for PPD with 91 women. 75 women provided data at follow-up (18%  
70 attrition). Mean Edinburgh Postnatal Depression Scale (EPDS) scores were 17/30 at baseline, and score  
71 reductions were larger in the experimental group ( $d=0.40$ , medium effect size) and clinically  
72 significant (7.5 vs. 3.3 points).

73 **Uptake and Impact:** The proposed online workshop is consistent with the proportionate universalism  
74 approach to public mental health which attempts to address the whole population while providing  
75 additional (selective/targeted/indicated) support for groups at risk. Treatment guidelines for PPD  
76 (including those written by the NPI) recommend a stepped approach where the least expensive and  
77 intrusive interventions are offered first and others only if necessary.<sup>21,22</sup> If effective, Online 1-Day  
78 CBT-Based Workshops would be an important low-intensity first step in international PPD treatment  
79 pathways, effectively treating some women, and identifying those in need of more intensive treatment.

80 **Knowledge Translation:** The proposed study and its KT plan will rapidly lead to the mobilization of  
81 knowledge to postpartum maternal care during COVID-19, as well as incorporation into practice  
82 guidelines. The results of our study will be communicated to knowledge users via end-of-grant KT  
83 methods that leverage our integrated (iKT) design. Our study team includes public health professionals,  
84 community experts, women with PPD, and mental health leaders. Women with PPD in a previous  
85 study<sup>59</sup> identified issues relevant to their needs and helped plan, design, and implement our workshops.

86 **End of Grant KT.** All KT strategies will focus on making our findings meaningful to users and  
87 highlight their relevance and implications for action. We will engage the media and circulate printed  
88 materials. We will also hold outcome seminars for participants online. Communication with

89 community and public health knowledge users will occur through webinars. Traditional methods of KT  
90 (journal and conference presentations) will also be used.

91 **Trial Design:** A parallel-group RCT with experimental (immediate workshop) and waitlist control  
92 (treatment 12 weeks later) groups will address our objectives. Participants complete emailed study  
93 questionnaires at baseline (T1, just before the experimental workshop) and 12 weeks later (T2, just  
94 prior to waitlist control workshop). Participants and the research coordinator cannot be blinded to  
95 group condition, but staff making reminders and data analysts will not be aware of group status.  
96 Therapists delivering groups will be randomly assigned to workshops and not notified of group status.

97 **Intervention:** The experimental (immediate workshop) group will receive the online workshop at  
98 baseline (T1), and the control (waitlist) group will receive the intervention twelve weeks later. Both  
99 groups can also receive care as usual from their healthcare providers.

100 The online workshop was developed by the NPI (a perinatal psychiatrist who has developed and tested  
101 effective brief group CBT for PPD interventions),<sup>23</sup> Peter Bieling (author of the world's leading group  
102 CBT manual), and June Brown (developer of 1-Day CBT-Based workshops for depression in the UK).<sup>9</sup>  
103 It is a day-long intervention delivered in 4 modules. Each participant is given a professionally designed  
104 manual (Attached) to facilitate learning. Weekly reminder emails are sent for 6 weeks after workshop  
105 completion to encourage practice. We also provide a list of PPD resources and a copy of the Canadian  
106 Practice Guidelines for the Treatment of PPD (written by NPI).

107 To expedite intervention delivery, 3 previously trained therapists from our *in-person* RCT (a clinical  
108 psychology trainee, registered psychotherapist, psychiatrist) will deliver the workshops. We have  
109 developed protocols to handle emergencies (e.g., suicidality, child protection), and will refer to clinical  
110 services as indicated.

111 **Randomization:** There will be 9 sets of online workshops (each set consisting of one experimental and  
112 one control workshop). Women will undergo block randomization to the experimental or waitlist  
113 control group using permuted block sizes of 4, 6, and 8. The randomization scheme will be generated in  
114 the statistical computing program R. The randomization of participants will be delivered to the research  
115 coordinator via the online REDCap (Research Electronic Data Capture) system. We will track reasons  
116 for loss to follow-up.

117 **Recruitment:** We will recruit participants via social and online media, our public health and  
118 community partners, midwifery groups, and obstetrical and family practices, (techniques utilized  
119 during our prior RCT/online feasibility work, and in the past with community PPD samples).<sup>24,25</sup>

120 **Minimizing Bias:** Staff making reminder calls and our data analyst will be unaware of participant  
121 status. Therapists will not be notified of group status and are randomly assigned to online workshops.  
122 In our *face-to-face* RCT and the study proposed here, we utilize gold standard measures, ask about  
123 current symptoms, and collect questionnaire responses via REDcap. This method is preferred by  
124 women of childbearing age, and reduces dropout rates and missing data.<sup>26</sup> We utilize Dillman's Method  
125 adapted for email surveys, with professionally designed/personalized emails, advance warning of  
126 questionnaires via email and telephone, assure anonymity, and minimize questionnaire number/length.  
127 We optimize screen format, designed error messages to help respondents troubleshoot difficulties,  
128 allow them to stop surveys and continue later, and provide a \$10 WalMart gift card for completing each  
129 set of questionnaires.<sup>27</sup> Predictors of attrition will be assessed and adjusted for in the analysis phase.  
130 While we permit co-interventions (e.g., medication use, concurrent psychotherapy), we will examine  
131 their impact.

132 **Study Eligibility:** Women who are >18 years old, have an infant <12 months at the time of  
 133 recruitment, fluent in written/spoken English, and have an EPDS score of  $\geq 10$  are eligible.

134 **Primary Outcome:** EPDS: The gold standard measure of PPD in clinical practice/research. A change  
 135 of 4 points is recognized as a clinically meaningful/significant improvement.<sup>58</sup> Differences between  
 136 experimental and control groups from T1 to T2 will be compared.

137 **Secondary Outcome (Cost-Effectiveness):**

138 Cost-effectiveness will be measured using incremental cost per quality-adjusted life year ratio.

139 **a) Costs:** Healthcare resource utilization data will be collected using a questionnaire based on the  
 140 Canadian Community Health Survey and the Service Use and Resources Form adapted for the  
 141 postpartum period and used in previous PPD research.<sup>24,28</sup> We will measure resources consumed over  
 142 the 6-week trial period from the perspective of public healthcare payer. Costs will be calculated using  
 143 provincial or other standard billing rates.

144 **b) Quality-Adjusted Life Year (QALY):** The EQ-5D-5L, a utility-based health-related quality of life  
 145 instrument<sup>29</sup> will be used. Its validity in measuring the impact of depression is established.<sup>30</sup> Its  
 146 Canadian scoring algorithm will be used.<sup>31</sup> For each participant, a QALY will be calculated by  
 147 multiplying the health utility for the matching time period (i.e., the area under the curve approach).

148 **Tertiary Outcomes:**

149 i) GAD-7: A 7-item self-report scale of symptoms of generalized anxiety disorder, the most common  
 150 PPD comorbidity (and a condition known to respond clinically to CBT).<sup>32</sup>

151 ii) Postpartum Bonding Questionnaire: 25-item maternal-report scale of the mother-infant  
 152 relationship.<sup>33</sup>

153 iii) The Social Provisions Scale (SPS) is a 24-item self-report measure of the degree to an individual  
 154 perceives their current social relationships to provide support.<sup>34</sup> The total scale score will be used in  
 155 this study.

156 iv) The Infant Behavior Questionnaire – Revised (Very Short Form) (IBQR): 37-item maternal report  
 157 measure of infant behavior and temperament.<sup>35</sup>

158 **Sample Size** The sample size for this study is 300 (type I error of 0.01, 90% power to detect a medium  
 159 effect size of 0.40). Anticipating 30% attrition of enrolled women (estimated to be higher during  
 160 COVID-19 because of increased levels of responsibility at home), we will approach 388 women to  
 161 participate (194 in each treatment arm). We conservatively estimate that 22 women will attend each  
 162 online workshop, and so in order to meet our target sample size (N=388), we will need to deliver 18  
 163 online workshops (nine sets of one experimental plus one control workshop). *In-person* RCT data show  
 164 that intervention brevity, study reminders, and ease of accessibility minimize compliance issues.

165 **Statistical Analyses:** All outcome data will be analyzed on an intention-to-treat basis. Between-group  
 166 intervention effects from baseline (T1) to T2 will be compared using longitudinal mixed effects (LME)  
 167 models.<sup>36</sup> LME models utilize all data on each subject, can accommodate outcome data that are  
 168 conditionally missing at random, and can flexibly model the effect of time and potential confounders  
 169 on continuous treatment outcomes (e.g., EPDS scores). They will also account for women being  
 170 clustered within workshop group using a random effects intercept, and control for the fixed effect of  
 171 differences between workshop facilitators. These models will utilize a restricted maximum likelihood  
 172 estimator method with an unstructured covariance matrix, which allows for maximum flexibility  
 173 estimating model variance components. Finally, multivariate logistic regression will determine if the

174 proportion of women achieving a clinically meaningful change (4 points on the EPDS) is different  
175 between the two treatment arms at T2, controlling for differences in workshop facilitator.

176 Our economic analyses will use the methods consistent with guidelines for economic evaluation.<sup>82,83</sup>  
177 We will calculate the incremental cost per QALY ratio by comparing the intervention group with the  
178 control. Clustered non-parametric bootstrapping will be used to calculate the 95% confidence interval  
179 for the ratio according to the trial design. The decision uncertainty will be presented using cost-  
180 effectiveness acceptability curves which show the probability of the intervention being cost-effective  
181 compared with the control group at a wide range of willingness-to-pay for a QALY.

182 **Subgroup Analyses:** We will examine the impact of therapist type.

### 183 Study Challenges and Mitigation Strategies

184 **Waitlist Controls:** This was selected because placebo-controlled trials in PPD are avoided on ethical  
185 grounds,<sup>39</sup> rates of adverse effects with counseling intervention RCTs are low,<sup>65</sup> and our *in-person* RCT  
186 data show that waitlist participants neither worsen nor use less mental health resources while waiting.  
187 PPD is not characterized by worsening over periods of twelve weeks, and all women in the trial can  
188 access healthcare unimpeded.<sup>40,41</sup> They are sent practice guidelines and other PPD resources at  
189 enrolment, and weekly emails reminding them of indications for seeking treatment (subjective  
190 worsening, suicidal ideation), who to contact (family doctor, emergency services), and the importance  
191 of doing so.

192 **Effectiveness:** Despite its brevity and large-group format, online workshops may be capable of  
193 producing meaningful improvements, and we utilize a range of different therapists to optimize  
194 generalizability and uptake. Even if not as effective as longer and more intensive CBT protocols, online  
195 workshops have greater reach, safely engaging and treating more women, enabling much larger  
196 numbers to receive treatment during COVID-19, and playing a role in large-scale PPD treatment.

### 197 Study Importance, Innovation, and Novelty

198 While a vaccine is sought and social distancing remains the norm, healthcare systems are in urgent  
199 need of safe, efficient, scalable means of treating PPD. The proposed study maximizes innovation and  
200 impact by using a novel online treatment that respects women's preferences, and an intervention (CBT)  
201 that can also improve postpartum anxiety. An existing RCT of workshops conducted *face-to-face* has  
202 enabled us to develop the trial infrastructure to begin immediately, and so Online 1-Day CBT-Based  
203 Workshops for PPD could represent a significant component of the next successfully implemented,  
204 research-enabled Canadian public health strategy, enhancing collaborative efforts to mitigate the  
205 negative consequences of COVID-19 on women with PPD and their families.

206

207

208

209

210

211

212

213

214

215 **References**

- 216 1. Gavin NI, Gaynes BN, Lohr KN, Meltzer-Brody S, Gartlehner G, Swinson T. Perinatal  
217 Depression: A Systematic Review of Prevalence and Incidence. *Obstet Gynecol.*  
218 2005;106(5):1071–83.
- 219 2. Cooper PJ, Murray L, Wilson A, Romaniuk H. Controlled trial of the short- and longterm effect  
220 of psychological treatment of postpartum depression I: Impact on maternal mood. *Br J*  
221 *Psychiatry.* 2003;182(5):412–9.
- 222 3. Lovejoy CM, Graczyk PA, O’Hare E, Neuman G. Maternal depression and parenting behavior.  
223 *Clin Psychol Rev.* 2000;20(5):561–92.
- 224 4. Misri S, Kendrick K. Perinatal Depression, Fetal Bonding, and Mother-Child Attachment: A  
225 Review of the Literature. *Curr Pediatr Rev.* 2008;4(2):66–70.
- 226 5. Bauer A, Knapp M, Adelaja B. Best practice for perinatal mental health care : the economic  
227 case. *PSSRU Rep.* 2016;
- 228 6. O’Mahen HA, Flynn HA. Preferences and Perceived Barriers to Treatment for Depression  
229 during the Perinatal Period. *J Women’s Heal [Internet].* 2008;17(8):1301–9. Available from:  
230 <http://www.liebertonline.com/doi/abs/10.1089/jwh.2007.0631>
- 231 7. Chabrol H, Teissedre F, Armitage J, Danel M, Walburg V. Acceptability of psychotherapy and  
232 antidepressants for postnatal depression among newly delivered mothers. *J Reprod Infant*  
233 *Psychol.* 2004;22(1):5–12.
- 234 8. Van Lieshout R. Managing postpartum depression : New moms isolated by coronavirus  
235 pandemic. *The Conversation [Internet].* 2020; Available from:  
236 [https://theconversation.com/managing-postpartum-depression-new-moms-isolated-by-](https://theconversation.com/managing-postpartum-depression-new-moms-isolated-by-coronavirus-pandemic-134773)  
237 [coronavirus-pandemic-134773](https://theconversation.com/managing-postpartum-depression-new-moms-isolated-by-coronavirus-pandemic-134773)
- 238 9. Brown JSL. Large scale stress management workshops for the general public: a controlled  
239 evaluation. *Behav Cogn Psychother.* 2000;(May 2014).
- 240 10. White J, Keenan M, Brooks N. Stress Control : A Controlled Comparative Investigation of Large  
241 Group Therapy for Generalized Anxiety Disorder Stress Control : A Controlled Comparative  
242 Investigation of Large Group Therapy for Generalized Anxiety Disorder. *Behav Cogn*  
243 *Psychother.* 1992;20:97–114.
- 244 11. Brown JS, Elliott SA, Boardman J, Andiappan M, Landau S, Howay E. Can the Effects of a 1-  
245 Day CBT Psychoeducational Workshop on Self-Confidence be Maintained After 2 Years? A  
246 Naturalistic Study. *Depress Anxiety.* 2008;25(August 2006):632–40.
- 247 12. Horrell L, Goldsmith KA, Tylee AT, Schmidt UH, Murphy CL, Bonin E, et al. One-day  
248 cognitive – behavioural therapy self-confidence workshops for people with depression:  
249 randomised controlled trial. *Br J Psychiatry.* 2014;202:222–33.
- 250 13. Sockol LE. A systematic review of the efficacy of cognitive behavioral therapy for treating and  
251 preventing perinatal depression. *J Affect Disord.* 2015;177:7–21.
- 252 14. Nillni YI, Mehralizade A, Mayer L, Milanovic S. Treatment of depression, anxiety, and trauma-  
253 related disorders during the perinatal period: A systematic review. *Clin Psychol Rev.*

- 254 2018;66(September 2017):136–48.
- 255 15. O’Hara M, McCabe J. Postpartum Depression: Current Status and Future Directions. *Ssrn*.  
256 2013;379–407.
- 257 16. Cuijpers P, van Straten A, Warmerdam L. Are individual and group treatments equally effective  
258 in the treatment of depression in adults? A meta-analysis. *Eur J Psychiatry*. 2008;22(1).
- 259 17. Butler AC, Chapman JE, Forman EM, Beck AT. The empirical status of cognitive-behavioral  
260 therapy : A review of The empirical status of cognitive-behavioral therapy : A review of meta-  
261 analyses. 2018;(February 2006):16–31.
- 262 18. Daley A, Jolly K, MacArthur C. The effectiveness of exercise in the management of post-natal  
263 depression: Systematic review and meta-analysis. *Fam Pract*. 2009;26(2):154–62.
- 264 19. Goodman JH, Santangelo G. Group treatment for postpartum depression : a systematic review.  
265 2011;277–93.
- 266 20. Milgrom J, Schembri C, Ericksen J, Ross J, Gemmill AW. Towards parenthood: An antenatal  
267 intervention to reduce depression, anxiety and parenting difficulties. *J Affect Disord [Internet]*.  
268 2011;130(3):385–94. Available from: <http://dx.doi.org/10.1016/j.jad.2010.10.045>
- 269 21. NICE. NICE clinical guideline 45: Antenatal and postnatal mental health. 2007;2007(April):48.
- 270 22. Austin M, Highet N, and the Expert Working Group. Mental Health Care in the Perinatal Period:  
271 Australian Clinical Practice Guideline. 2017;(October):1–121. Available from:  
272 <http://cope.org.au/about/review-of-new-perinatal-mental-health-guidelines/>
- 273 23. Van Lieshout RJ, Yang L, Haber E, Ferro MA. Evaluating the effectiveness of a brief group  
274 cognitive behavioural therapy intervention for perinatal depression. *Arch Womens Ment Health*  
275 [Internet]. 2017;20(1):225–8. Available from: <http://dx.doi.org/10.1007/s00737-016-0666-9>
- 276 24. Van Lieshout RJ, Layton H, Rangan M, Ferro MA, Brown JS, Bieling PJ. Treating Postpartum  
277 Depression with 1-Day Cognitive Behavioural Therapy-Based Workshops. *J Obstet Gynaecol*  
278 *Canada*.
- 279 25. Van Lieshout RJ, Layton H, Feller A, Ferro MA, Biscaro A, Bieling PJ. Public Health Nurse  
280 Delivered Group Cognitive Behavioural Therapy (CBT) for Postpartum Depression: A Pilot  
281 Study. *Manuscr Submitt Publ*.
- 282 26. van Gelder M, Cerutti B, Ebert JF, Huibers L, Christensen B, Bondo CM. Paper- or Web-Based  
283 Questionnaire Invitations as a Method for Data Collection: Cross-Sectional Comparative Study  
284 of Differences in Response Rate, Completeness of Data, and Financial Cost. *J Med Internet Res*.  
285 2018;20(1).
- 286 27. Dillman, D.A., Smyth, J.D., Christian LM. Internet, phone, mail, and mixed-mode surveys: the  
287 tailored design method. 4th Editio. Hoboken, NJ: Wiley; 2014.
- 288 28. Canadian Community Health Survey (CCHS). Questionnaire for Cycle 1.1. 2001.
- 289 29. Group TE. EuroQol \* - a new facility for the measurement of health-related quality of life.  
290 1990;16:199–206.
- 291 30. Crick K, Al F, Arto S, Jeffrey O. Responsiveness of the anxiety / depression dimension of the 3-  
292 and 5-level versions of the EQ-5D in assessing mental health. *Qual Life Res [Internet]*.

- 293 2018;27(6):1625–33. Available from: <http://dx.doi.org/10.1007/s11136-018-1828-1>
- 294 31. Xie F, Pullenayegum E, Gaebel K. ORIGINAL ARTICLE A Time Trade-off-derived Value Set  
295 of the EQ-5D-5L for Canada. 2016;54(1):98–105.
- 296 32. Spitzer RL, Kroenke K, Williams JBW, Lowe B. A Brief Measure for Assessing Generalized  
297 Anxiety Disorder. *Arch Intern Med.* 2006;166(10):1092–7.
- 298 33. Brockington IF, Fraser C, Wilson D. The Postpartum Bonding Questionnaire: A validation. *Arch  
299 Womens Ment Health.* 2006;9(5):233–42.
- 300 34. Cutrona EC, Russell DW. The Provisions of Social Relationships and Adaptation to Stress. *Adv  
301 Pers Relationships.* 1987;1:37–67.
- 302 35. Putnam SP, Helbig AL, Gartstein MA, Rothbart MK, Leerkes E. Development and assessment  
303 of short and very short forms of the infant behavior questionnaire-revised. *J Pers Assess.*  
304 2014;96(4):445–58.
- 305 36. Singer J, Willett J. *Applied Longitudinal Data Analysis. Modeling Change and Event  
306 Occurrence.* New York: Oxford University Press; 2003.
- 307 37. Husereau, D., Drummond, M., Petrou, S., Carswell, C., Moher, D., Greenberg, D., Augustovski,  
308 F., Briggs, A.H., Mauskopf, J., Loder E. Consolidated Health Economic Evaluation Reporting  
309 Standards (CHEERS) Statement. *Int J Technol Assess Health Care.* 2013;29(2):117–22.
- 310 38. Petrou S, Gray A. Economic evaluation alongside randomised controlled trials: Design, conduct,  
311 analysis, and reporting. *Bmj.* 2011;342(7806):1–6.
- 312 39. Millum J, Grady C. The ethics of placebo-controlled trials: Methodological justifications.  
313 *Contemp Clin Trials* [Internet]. 2013;36(2):510–4. Available from:  
314 <http://dx.doi.org/10.1016/j.cct.2013.09.003>
- 315 40. Goodman JH. Postpartum depression beyond the early postpartum period. *JOGNN - J Obstet  
316 Gynecol Neonatal Nurs.* 2004;33(4):410–20.
- 317 41. Beeghly M, Weinberg MK, Olson KL, Kernan H, Riley J, Tronick EZ. Stability and change in  
318 level of maternal depressive symptomatology during the first postpartum year. *J Affect Disord.*  
319 2002;71(1–3):169–80.

320
