# Supplementary material
Source: PubMed Central journal article supplement (PMC8427485)
Supplement: jamapsychiatry-e212488-s002.pdf [file jamapsychiatry-e212488-s002.pdf]

## Supplementary Online Content

Van Lieshout RJ, Layton H, Savoy CD, et al. Effect of online 1-day cognitive behavioral therapy–based workshops plus usual care vs usual care alone for postpartum depression: a randomized clinical trial. *JAMA Psychiatry*. Published online September 8, 2021. doi:10.1001/jamapsychiatry.2021.2488

**eFigure.** Online 1-Day CBT Workshop Itinerary

**eTable 1.** Group × Time Interactions for Beck Depression Inventory-II Scores

**eTable 2.** Changes in Mean Beck Depression Inventory-II Scores

This supplementary material has been provided by the authors to give readers additional information about their work.

eFigure. Online 1-Day CBT Workshop Itinerary

# *ITINERARY*

|                                                                                                                                                                                                                                                                                                                                                                                                                                                               |                                                                                                                                                                                                                                                                       |
|---------------------------------------------------------------------------------------------------------------------------------------------------------------------------------------------------------------------------------------------------------------------------------------------------------------------------------------------------------------------------------------------------------------------------------------------------------------|-----------------------------------------------------------------------------------------------------------------------------------------------------------------------------------------------------------------------------------------------------------------------|
| <p><b>1</b><br/><b>INTRODUCTIONS</b></p> <p><b>2</b><br/><b>CAUSES OF LOW MOOD AFTER BABY</b><br/><i>-How (early) experiences affect self-image</i><br/><i>-Developing more positive self-image</i></p> <p><b>BREAK 10:30</b></p> <p><b>13</b><br/><b>HOW TO THINK DIFFERENTLY</b><br/><i>-What are we thinking and feeling?</i><br/><i>-Being compassionate (with ourselves)</i><br/><i>-Developing more balanced thoughts</i></p> <p><b>BREAK 12:00</b></p> | <p><b>19</b><br/><b>CALMING OUR BODY AND MIND</b><br/><i>-Anxiety and Worry</i><br/><i>-Calming and Relaxation</i></p> <p><b>BREAK 2:30</b></p> <p><b>24</b><br/><b>THRIVING THROUGH ACTION</b><br/><i>-Assertiveness</i><br/><i>-Getting support from others</i></p> |
|---------------------------------------------------------------------------------------------------------------------------------------------------------------------------------------------------------------------------------------------------------------------------------------------------------------------------------------------------------------------------------------------------------------------------------------------------------------|-----------------------------------------------------------------------------------------------------------------------------------------------------------------------------------------------------------------------------------------------------------------------|



1

**eTable 1. Group × Time Interactions for Beck Depression Inventory-II Scores**

| <b>Beck Depression Inventory Results</b> |       |       |        |       |         |
|------------------------------------------|-------|-------|--------|-------|---------|
| Outcome Measure                          | B     | SD    | df     | T     | P       |
| BDI                                      | -5.68 | 14.76 | 362.32 | -7.33 | <0.001* |

N (experimental)=202, N (control)=201

\*Statistically significant difference between experimental and control groups (p<0.05)

**eTable 2. Changes in Mean Beck Depression Inventory-II Scores**

|     | Experimental Group (N=202) |      |              |      |        |           | Control Group (N=201) |      |             |      |        |           |
|-----|----------------------------|------|--------------|------|--------|-----------|-----------------------|------|-------------|------|--------|-----------|
|     | Time 1                     |      | Time 2       |      | Δ mean | 95% CI    | Time 1                |      | Time 2      |      | Δ mean | 95% CI    |
|     | Mean                       | SD   | Mean         | SD   |        |           | Mean                  | SD   | Mean        | SD   |        |           |
| BDI | 22.53                      | 8.67 | <b>14.55</b> | 9.23 | -7.98  | 6.25-9,75 | 21.92                 | 8.64 | <b>19.7</b> | 8.79 | -2.22  | 0.50-3.91 |

Analyses were conducted using linear mixed models controlling for workshop facilitator as a fixed effect, yielding estimated marginal means.

\*Statistically significant ( $p < 0.05$ ) mean difference and Group x Time interaction
