# Supplementary material
Source: PubMed Central journal article supplement (PMC8427485)
Supplement: jamapsychiatry-e212488-s003.pdf [file jamapsychiatry-e212488-s003.pdf]

## Data Sharing Statement

Van Lieshout. Effect of Online 1-Day Cognitive Behavioral Therapy-Based Workshops Plus Usual Care vs Usual Care Alone for Postpartum Depression. *JAMA Psychiatry*. Published September 08, 2021. doi:10.1001/jamapsychiatry.2021.2488

### Data

**Data available:** No

### Additional Information

**Explanation for why data not available:** There are currently graduate students working on projects related to the data. The data will be made available upon reasonable request to the corresponding author.
